# Supplementary material for: Fluorescent styryl pyridine-N-oxide probes for imaging lipid droplets
Source: Royal Society of Chemistry journal article supplement (doi:10.1039/d3ob01365k), 2023-01-01
Supplement: d3ob01365k1.pdf [file d3ob01365k1.pdf]

Supporting Information

**Fluorescent Styryl Pyridine-N-Oxide Probes for Imaging Lipid Droplets**

Yogesh Dubey<sup>a</sup>, Paramasivam Mahalingavelar<sup>b</sup>, Deeksha Rajput<sup>a</sup>, Dipeshwari J. Shewale<sup>c</sup>,  
Virupakshi Soppina\* and Sriram Kanvah\*

<sup>a</sup>Department of Chemistry, Indian Institute of Technology Gandhinagar, Palaj, Gandhinagar, Gujarat – 382055: email: [sriram@iitgn.ac.in](mailto:sriram@iitgn.ac.in)

<sup>b</sup>School of Chemistry and Biochemistry, Georgia Institute of Technology Atlanta Georgia 30332

<sup>c</sup>Department of Biological Engineering, Indian Institute of Technology Gandhinagar, Palaj, Gandhinagar, Gujarat -382055 Email: [vsoppina@iitgn.ac.in](mailto:vsoppina@iitgn.ac.in);

**Table of Contents**

|              |                                                                                                                                                                                                                                 |
|--------------|---------------------------------------------------------------------------------------------------------------------------------------------------------------------------------------------------------------------------------|
| S1           | Synthetic procedure                                                                                                                                                                                                             |
| Figure S2    | Absorption spectral data for <b>5NO</b> , <b>6NO</b> , <b>MNO</b> and <b>TNO</b>                                                                                                                                                |
| Figure S3    | Emission spectral data for <b>5NO</b> , <b>6NO</b> and <b>MNO</b>                                                                                                                                                               |
| Figure S4    | Fluorescence lifetime decay of the compounds                                                                                                                                                                                    |
| Table S1     | Lifetime data of compounds in various organic solvents                                                                                                                                                                          |
| Table S2     | Geometrical coordinates of the N-oxide derivatives                                                                                                                                                                              |
| Table S3     | TDDFT results of the <b>TN</b> , <b>TNC</b> , and <b>TNO</b> derivatives provided with computed excitation energy, oscillator strength, major transitions involved in terms of frontier molecular Orbitals, and dipole moments. |
| Table S4, S5 | Comparison of absorption properties of the molecules with computed excitation energy, oscillator strength, major transitions involved in terms of frontier molecular Orbitals, and dipole moments                               |
| Figure S5    | pH-dependent absorbance titration for <b>DNO</b> , <b>5NO</b> , <b>6NO</b> and <b>MNO</b>                                                                                                                                       |
| Figure S6    | pH-dependent emission titration for <b>DNO</b> , <b>5NO</b> , <b>6NO</b> and <b>MNO</b>                                                                                                                                         |
| Figure S7    | Overlay pH-dependent NMR for <b>DNO</b>                                                                                                                                                                                         |
| Figure S8    | Influence of added analytes on the absorption and emission of <b>TNO</b>                                                                                                                                                        |
| Figure S9    | Live cell imaging of control molecules                                                                                                                                                                                          |
| Figure S10   | MTT Assay for <b>TNO</b> and <b>TNC</b>                                                                                                                                                                                         |
| Table S6     | The molar absorption coefficient ( $\epsilon$ ) of all molecules                                                                                                                                                                |
| S11          | Characterisation data                                                                                                                                                                                                           |
|              | References                                                                                                                                                                                                                      |

## S1. Synthetic procedure

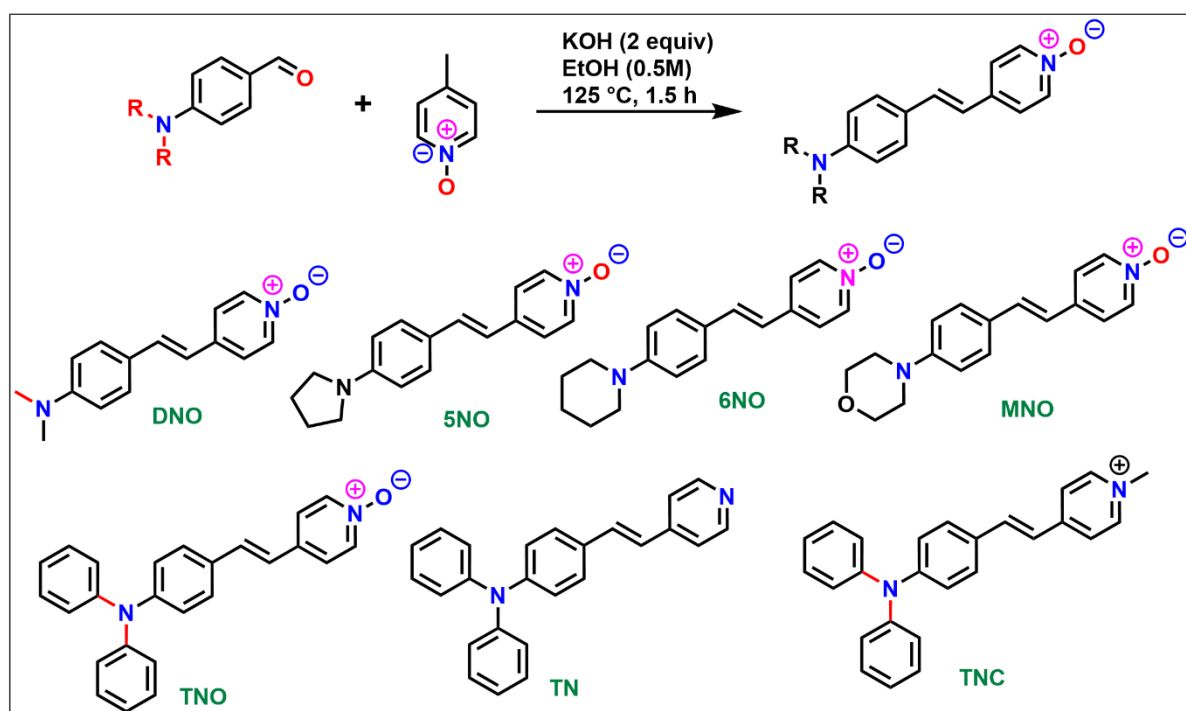

### General procedure for the synthesis of DNO, 5NO and MNO:

In a dry round bottom flask equipped with a magnetic bead, *p*-amino benzaldehyde (1 equiv), 4-methylpyridine-N-oxide (1 equiv.) and potassium hydroxide (2 equiv) were added. The reaction was purged with argon gas and added ethanol (0.5M). The reaction was heated at 125° C for 2 hours, and the progress of the reaction was monitored by TLC. The reaction mixture was filtered, and the insoluble solid was collected, washed multiple times with diethyl ether, dried and weighed.

### General procedure for the synthesis of TNO and 6NO:

In a dry round bottom flask equipped with a magnetic bead, *p*-amino benzaldehyde (1 equiv), 4-methylpyridine-N-oxide (1 equiv), and potassium hydroxide (2 equiv) were added. The reaction was purged with argon gas and added ethanol (0.5M). The reaction was heated at 125° C for 2 hours and the progress of the reaction was monitored by TLC. The reaction was concentrated on a rotary evaporator and purified by column chromatography on 100-200 mesh size silica gel with gradient elution from 1 to 5 % methanol in DCM.

Synthesis and optical properties of TN and TNC were referred from literature<sup>1,2</sup>.

**Figure S2.** Absorption spectral data for 5NO, 6NO, MNO and TNO

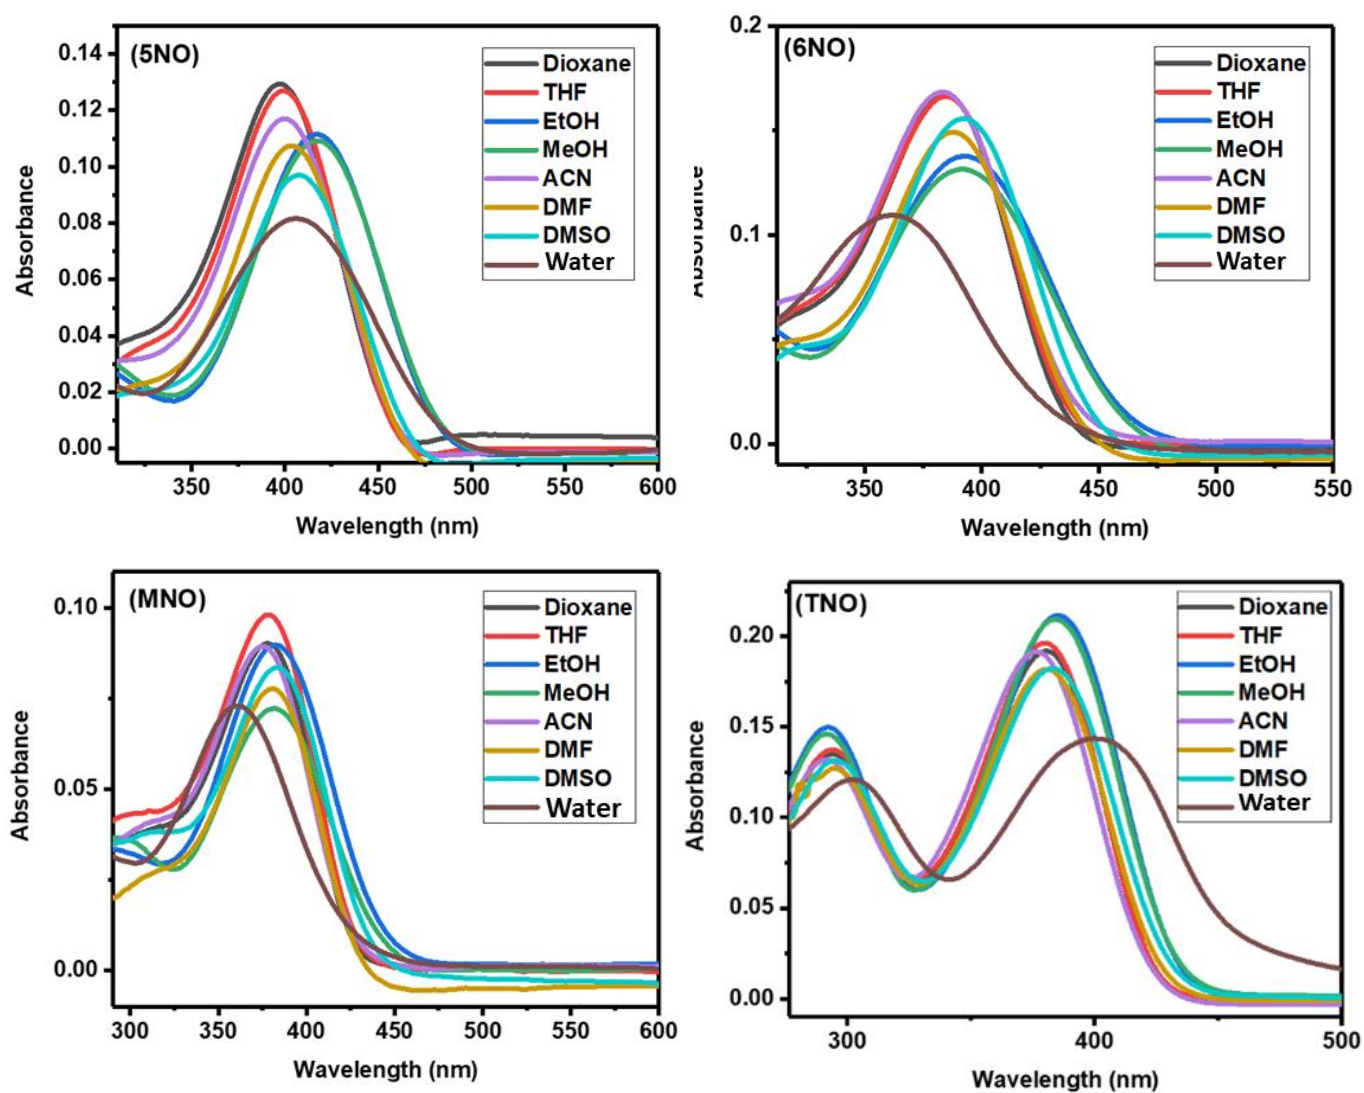

**Figure S3.** Emission spectral data of compounds 5NO, 6NO, and MNO in different solvents.

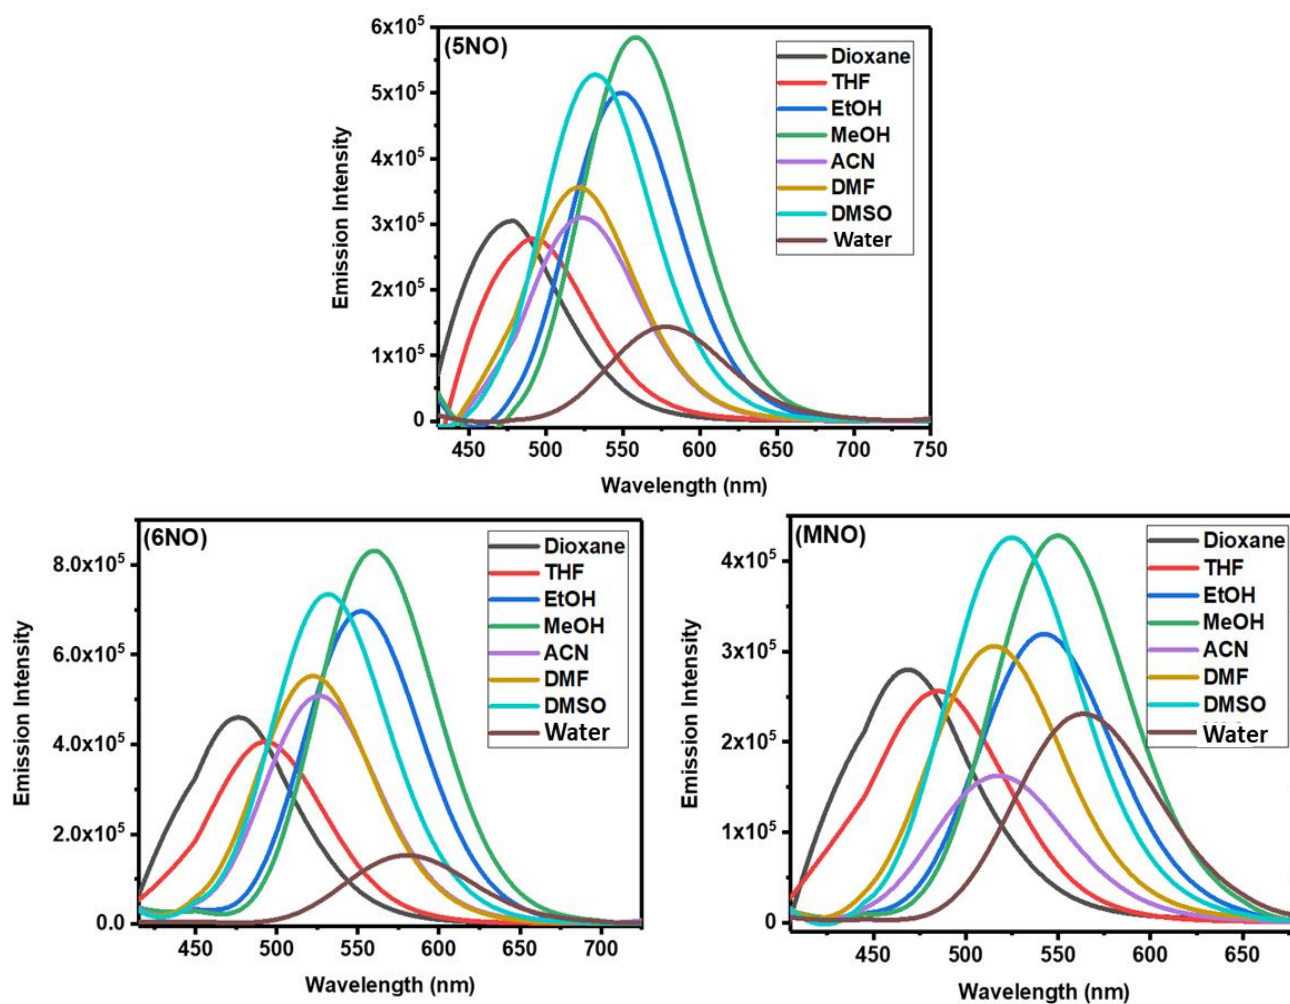

Figure S4. Fluorescence lifetime decay of the compounds

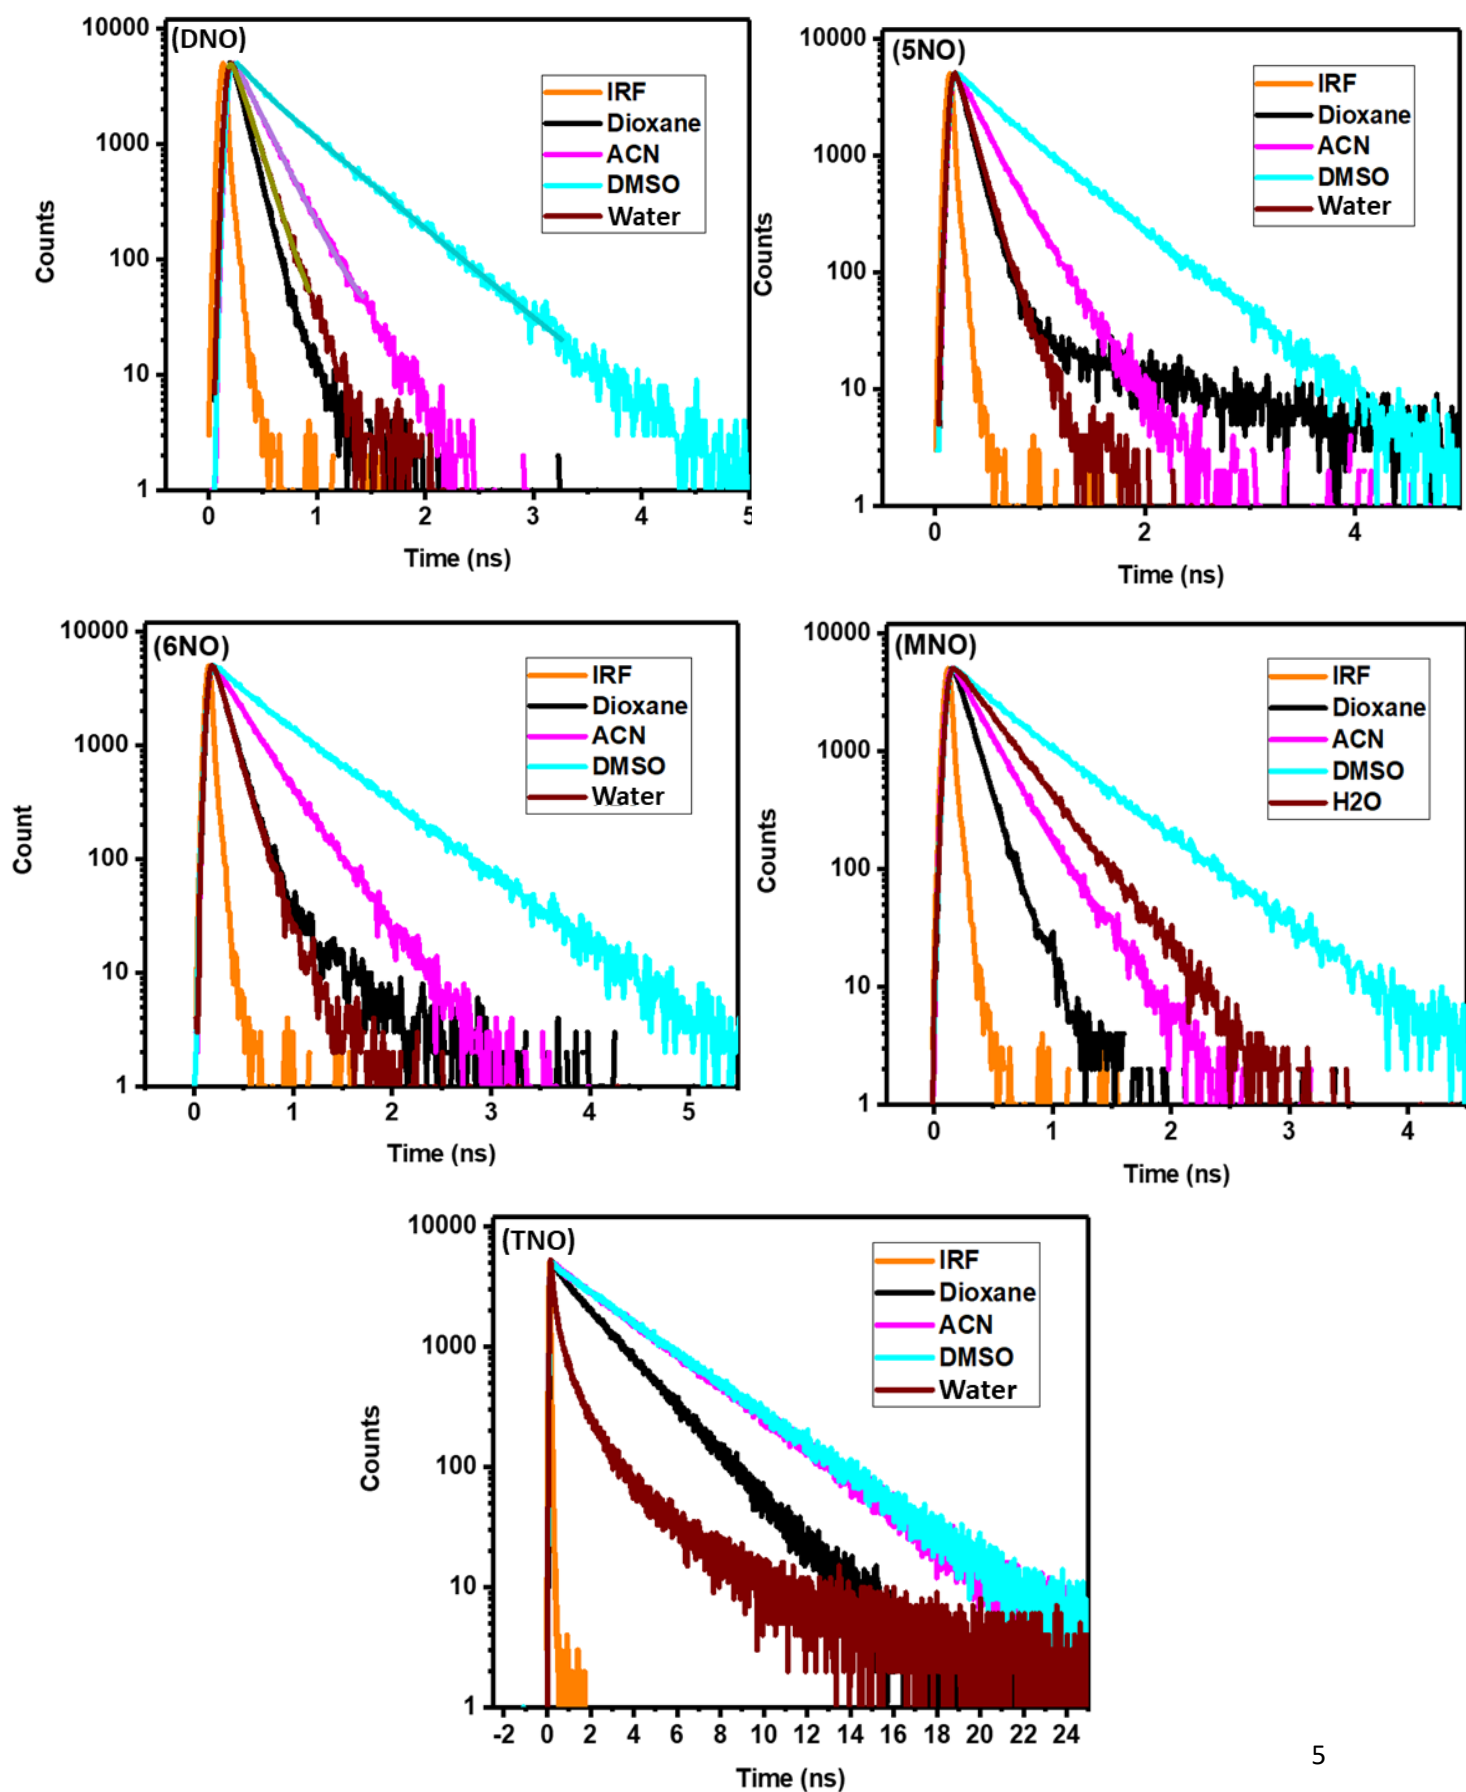

**Table S1:** Lifetime properties of compounds in various solvents

| Compound   | Solvents       | $\tau_1$ (ns) | A1 (%) | $\tau_2$ (ns) | A2 (%) | $\tau_3$ (ns) | A3 (%) | Average lifetime ( $\tau$ ) (ns) | $\chi^2$ |
|------------|----------------|---------------|--------|---------------|--------|---------------|--------|----------------------------------|----------|
| <b>DNO</b> | <b>Dioxane</b> | 0.10          | 100    | -             | -      | -             | -      | 0.10                             | 0.99     |
|            | <b>ACN</b>     | 0.23          | 100    | -             | -      | -             | -      | 0.23                             | 1.18     |
|            | <b>DMSO</b>    | 0.13          | 9.36   | 0.55          | 90.64  | -             | -      | 0.43                             | 1.10     |
|            | <b>water</b>   | 0.14          | 100    | -             | -      | -             | -      | 0.14                             | 1.09     |
| <b>5NO</b> | <b>Dioxane</b> | 0.11          | 100    | -             | -      | -             | -      | 0.11                             | 1.06     |
|            | <b>ACN</b>     | 0.23          | 100    | -             | -      | -             | -      | 0.23                             | 1.19     |
|            | <b>DMSO</b>    | 0.27          | 13.76  | 0.62          | 86.24  | -             | -      | 0.52                             | 1.05     |
|            | <b>water</b>   | 0.13          | 100    | -             | -      | -             | -      | 0.13                             | 1.02     |
| <b>6NO</b> | <b>Dioxane</b> | 0.13          | 100    | -             | -      | -             | -      | 0.13                             | 1.16     |
|            | <b>ACN</b>     | 0.30          | 100    | -             | -      | -             | -      | 0.30                             | 1.23     |
|            | <b>DMSO</b>    | 0.15          | 6.52   | 0.67          | 93.48  | -             | -      | 0.55                             | 0.99     |
|            | <b>water</b>   | 0.13          | 100    | -             | -      | -             | -      | 0.13                             | 1.09     |
| <b>MNO</b> | <b>Dioxane</b> | 0.12          | 100    | -             | -      | -             | -      | 0.12                             | 1.23     |
|            | <b>ACN</b>     | 0.23          | 100    | -             | -      | -             | -      | 0.23                             | 1.31     |
|            | <b>DMSO</b>    | 0.17          | 9.08   | 0.58          | 90.92  | -             | -      | 0.48                             | 1.17     |
|            | <b>water</b>   | 0.31          | 100    | -             | -      | -             | -      | 0.31                             | 1.20     |
| <b>TNO</b> | <b>Dioxane</b> | 0.43          | 3.36   | 2.20          | 96.64  | -             | -      | 1.94                             | 1.06     |
|            | <b>ACN</b>     | 3.30          | 100    | -             | -      | -             | -      | 3.30                             | 1.13     |
|            | <b>DMSO</b>    | 3.40          | 100    | -             | -      | -             | -      | 3.40                             | 1.13     |
|            | <b>water</b>   | 0.55          | 33.65  | 1.80          | 30.70  | 0.13          | 33.65  | 0.30                             | 1.08     |

**Table S2** Geometrical coordinates of the N-oxide derivatives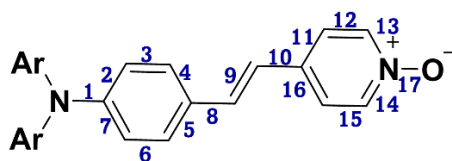

|                | 5NO   | 6NO   | DNO   | PNO   | TNO   |
|----------------|-------|-------|-------|-------|-------|
| <b>N1-C2</b>   | 1.365 | 1.438 | 1.374 | 1.411 | 1.397 |
| <b>C2-C3</b>   | 1.420 | 1.400 | 1.416 | 1.404 | 1.414 |
| <b>C3-C4</b>   | 1.382 | 1.390 | 1.385 | 1.386 | 1.387 |
| <b>C4-C5</b>   | 1.410 | 1.407 | 1.407 | 1.406 | 1.407 |
| <b>C5-C6</b>   | 1.408 | 1.407 | 1.409 | 1.408 | 1.409 |
| <b>C6-C7</b>   | 1.384 | 1.388 | 1.382 | 1.384 | 1.384 |
| <b>C7-C2</b>   | 1.416 | 1.400 | 1.420 | 1.412 | 1.408 |
| <b>C5-C8</b>   | 1.454 | 1.463 | 1.455 | 1.457 | 1.458 |
| <b>C8-C9</b>   | 1.352 | 1.348 | 1.352 | 1.351 | 1.350 |
| <b>C9-C10</b>  | 1.454 | 1.457 | 1.455 | 1.456 | 1.456 |
| <b>C10-C11</b> | 1.408 | 1.408 | 1.410 | 1.407 | 1.409 |
| <b>C11-C12</b> | 1.377 | 1.374 | 1.375 | 1.378 | 1.374 |
| <b>C12-N13</b> | 1.367 | 1.372 | 1.371 | 1.367 | 1.371 |
| <b>N13-C14</b> | 1.371 | 1.367 | 1.367 | 1.37  | 1.367 |
| <b>C14-C15</b> | 1.374 | 1.378 | 1.377 | 1.374 | 1.377 |
| <b>C15-C16</b> | 1.410 | 1.406 | 1.407 | 1.409 | 1.406 |
| <b>N14-O17</b> | 1.288 | 1.284 | 1.287 | 1.286 | 1.285 |

**Table S3** TDDFT results of the TN, TNC and TNO derivatives provided with computed excitation energy, oscillator strength, major transitions involved in terms of frontier molecular Orbitals, and dipole moments.

|            | $\lambda_{\omega X97BD}^a$<br>(nm) | $f_{\omega X97BD}^a$ | Major transitions                                                          | $\mu_g^b$<br>(Debye) | $\mu_e^c$<br>(Debye) |
|------------|------------------------------------|----------------------|----------------------------------------------------------------------------|----------------------|----------------------|
| <b>TN</b>  | 361.3                              | 1.34                 | HOMO->LUMO (86%),<br>H-1->LUMO (11%)                                       | 5.76                 | 5.26                 |
| <b>TNC</b> | 430.2                              | 1.23                 | HOMO(A)->LUMO(A) (24%),<br>HOMO(B)->LUMO(B) (55%)<br>H-1(B)->LUMO(B) (9%), | 8.48                 | 8.53                 |
| <b>TNO</b> | 375.2                              | 1.89                 | HOMO->LUMO (91%),<br>H-1->L+4 (2%),<br>HOMO->L+4 (3%)                      | 7.8                  | 7.8                  |

<sup>a</sup>TDDFT simulated absorption maximum and oscillator strength using  $\omega X97BD/6-31G^{**}/C-PCM(THF)$  level of theory; <sup>b</sup> $\mu_g$ : ground state dipole moment; <sup>c</sup> $\mu_e$ : transient dipole moment.

**Table S4** Comparison of absorption properties of the molecules with computed excitation energy, oscillator strength, major transitions involved in terms of frontier molecular Orbitals, and dipole moments.

|            | $\lambda_{exp}^a$<br>(nm) | $\lambda_{CAM-B3LYP}^b$<br>(nm) | $f_{CAM-B3LYP}^b$ | Major transitions                                     | $\mu_g^c$<br>(Debye) | $\mu_e^d$<br>(Debye) |
|------------|---------------------------|---------------------------------|-------------------|-------------------------------------------------------|----------------------|----------------------|
| <b>5NO</b> | 403                       | 361.8                           | 1.91              | HOMO->LUMO (93%)                                      | 12.0                 | 11.6                 |
| <b>6NO</b> | 383                       | 322.5                           | 1.78              | HOMO->LUMO (91%), H-<br>2->LUMO (2%)                  | 6.5                  | 6.7                  |
| <b>DNO</b> | 395                       | 357.5                           | 1.1.85            | HOMO->LUMO (93%)                                      | 11.3                 | 10.9                 |
| <b>MNO</b> | 377                       | 349.4                           | 1.88              | HOMO->LUMO (93%)                                      | 8.1                  | 7.8                  |
| <b>TNO</b> | 380                       | 365.3                           | 1.89              | HOMO->LUMO (89%), H-1->L+4<br>(2%),<br>HOMO->L+4 (4%) | 7.8                  | 7.7                  |

<sup>a</sup>Absorption spectra measured in THF in the concentration of  $1 \times 10^{-5}$  M at ambient temperature; <sup>b</sup>TDDFT simulated absorption maximum and oscillator strength using **B3LYP/6-31G<sup>\*\*</sup>/C-PCM(THF)** level of theory; <sup>c</sup> $\mu_g$ : ground state dipole moment; <sup>d</sup> $\mu_e$ : transient dipole moment.



**Table S5** Comparison of absorption properties of the molecules with computed excitation energy, oscillator strength, major transitions involved in terms of frontier molecular Orbitals, and dipole moments.

|            | $\lambda_{\text{exp}}^{\text{a}}$<br>(nm) | $\lambda_{\text{CAM-B3LYP}}^{\text{b}}$<br>(nm) | $f_{\text{CAM-B3LYP}}^{\text{b}}$ | Major transitions                                  | $\mu_{\text{g}}^{\text{c}}$<br>(Debye) | $\mu_{\text{e}}^{\text{d}}$<br>(Debye) |
|------------|-------------------------------------------|-------------------------------------------------|-----------------------------------|----------------------------------------------------|----------------------------------------|----------------------------------------|
| <b>5NO</b> | 403                                       | 361.8                                           | 1.91                              | HOMO->LUMO (93%)                                   | 12.0                                   | 11.6                                   |
| <b>6NO</b> | 383                                       | 322.5                                           | 1.78                              | HOMO->LUMO (91%), H-2->LUMO (2%)                   | 6.5                                    | 6.7                                    |
| <b>DNO</b> | 395                                       | 357.5                                           | 1.1.85                            | HOMO->LUMO (93%)                                   | 11.3                                   | 10.9                                   |
| <b>MNO</b> | 377                                       | 349.4                                           | 1.88                              | HOMO->LUMO (93%)                                   | 8.1                                    | 7.8                                    |
| <b>TNO</b> | 380                                       | 365.3                                           | 1.89                              | HOMO->LUMO (89%), H-1->L+4 (2%),<br>HOMO->L+4 (4%) | 7.8                                    | 7.7                                    |

<sup>a</sup>Absorption spectra measured in THF in the concentration of  $1 \times 10^{-5}$  M at ambient temperature; <sup>b</sup>TDDFT simulated absorption maximum and oscillator strength using **CAM-B3LYP/6-31G\*\*/C-PCM(THF)** level of theory; <sup>c</sup> $\mu_{\text{g}}$ : ground state dipole moment; <sup>d</sup> $\mu_{\text{e}}$ : transient dipole moment. Both CAM-B3LYP and B3LYP gave identical results.

**Figure. S5.** pH-dependent absorbance titration for DNO, 5NO, 6NO and MNO

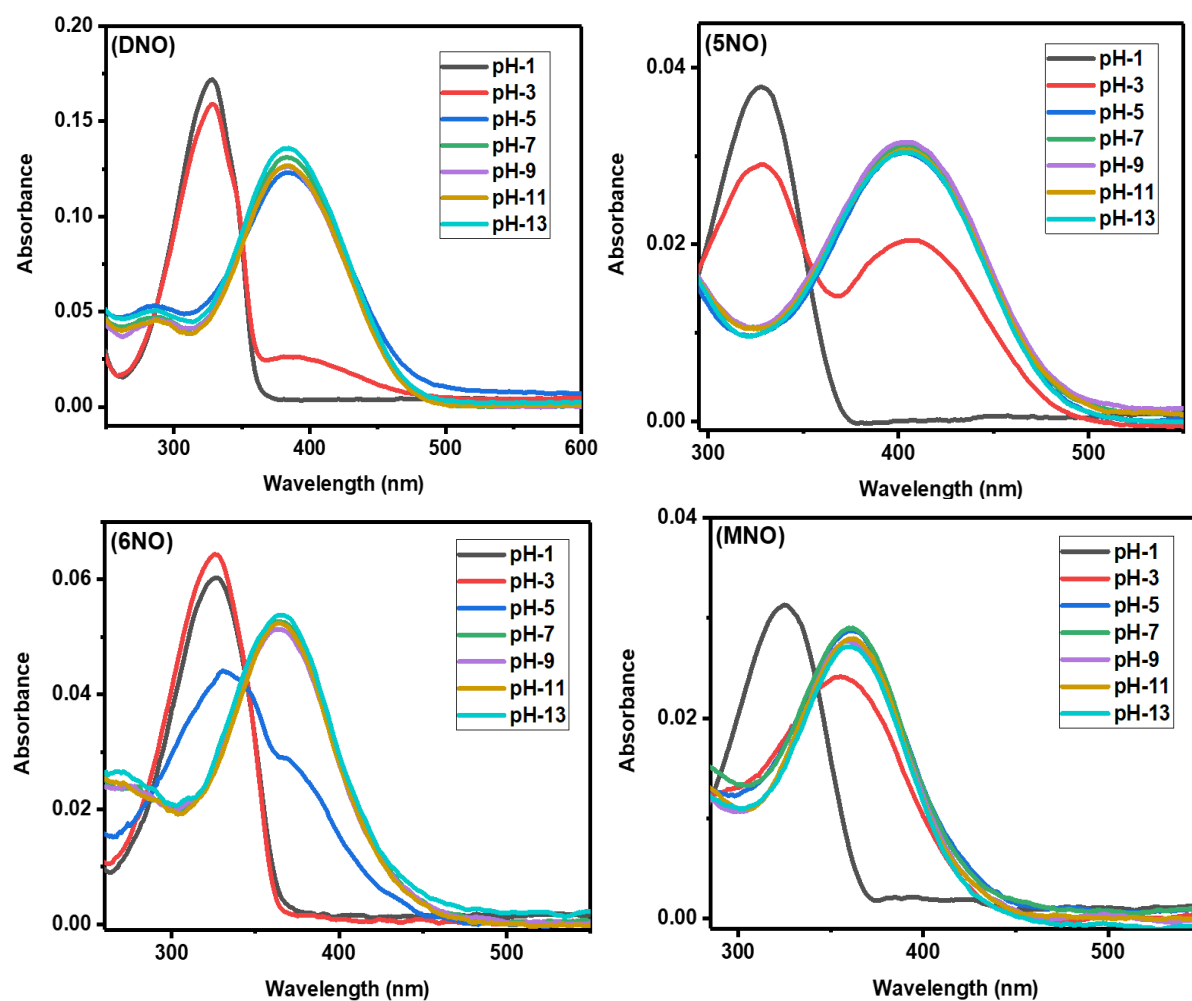

**Figure S6.** pH-dependent emission spectra for DNO, 5NO, 6NO and MNO

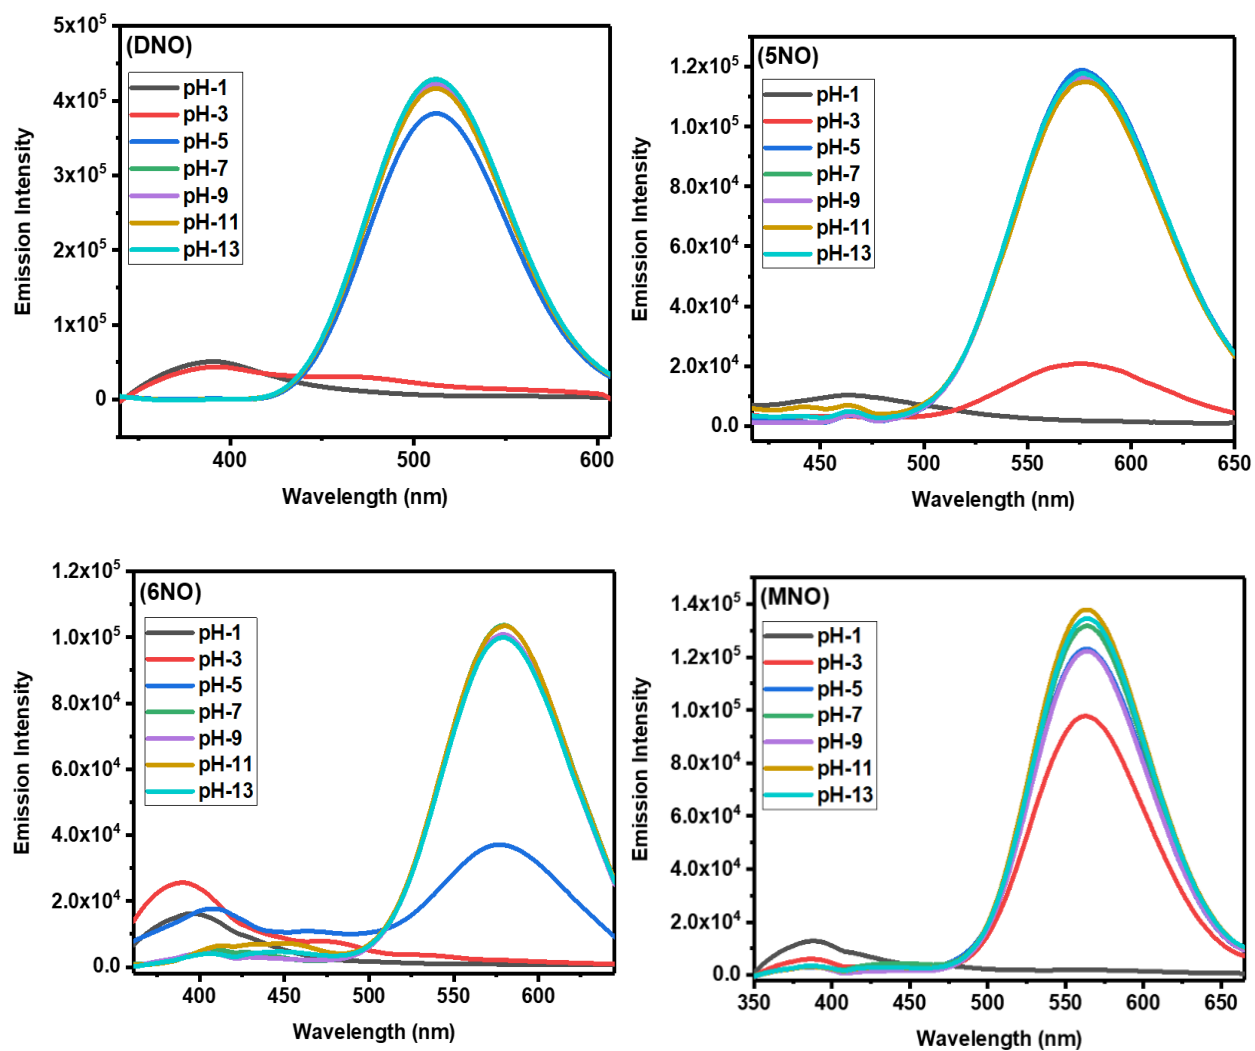

**Figure S7.** Overlay pH-dependent NMR for DNO

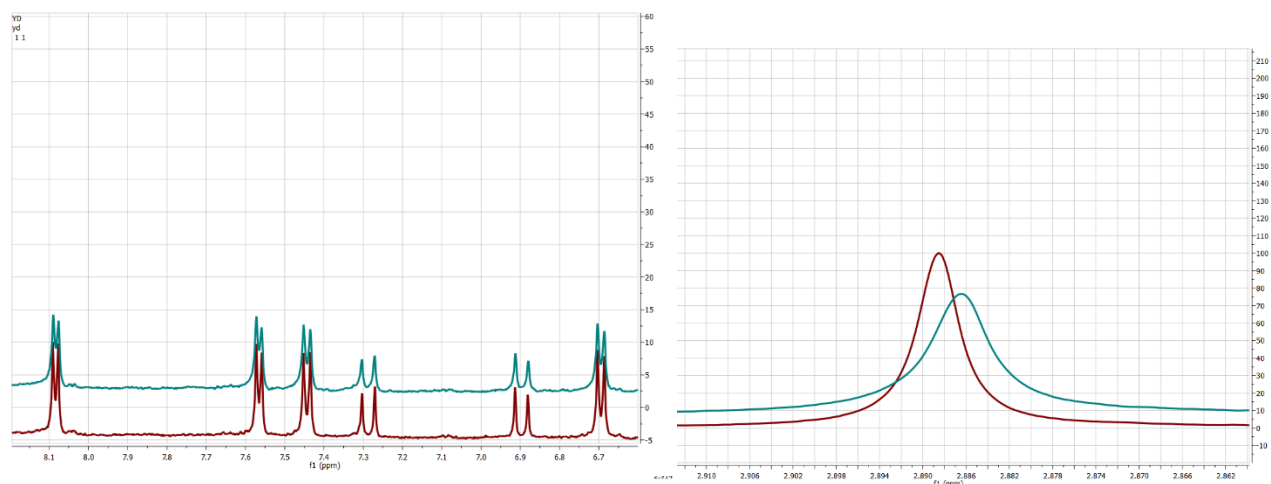

Overlay NMR spectra of DNO in pH-3 (red line) and pH-7 (green line). Calibrated axis - 2.5 ppm (DMSO-d<sub>6</sub>).

**Figure S8: Influence of added analytes on the absorption and emission of TNO**

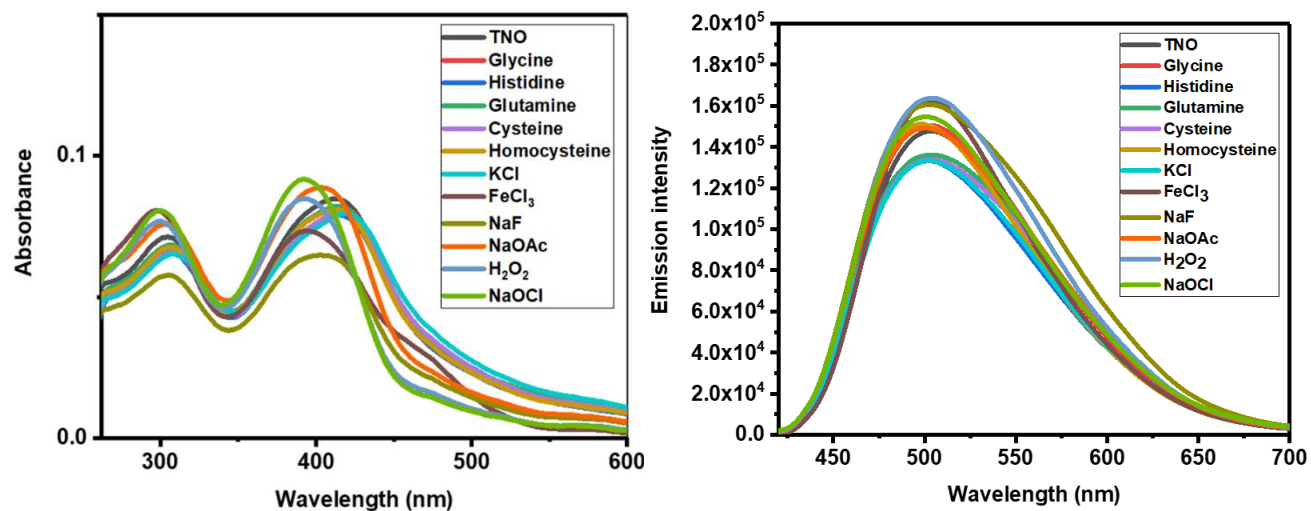

(Excitation Wavelength 380nm. Absorption and emission is recorded after 5 minutes of addition of the analyte)

**Figure S9:** Live cell imaging in COS-7 cells: DNO, 5NO, 6NO, and MNO. The data suggests weaker specificity of the molecules Scale bar 10 $\mu$ m

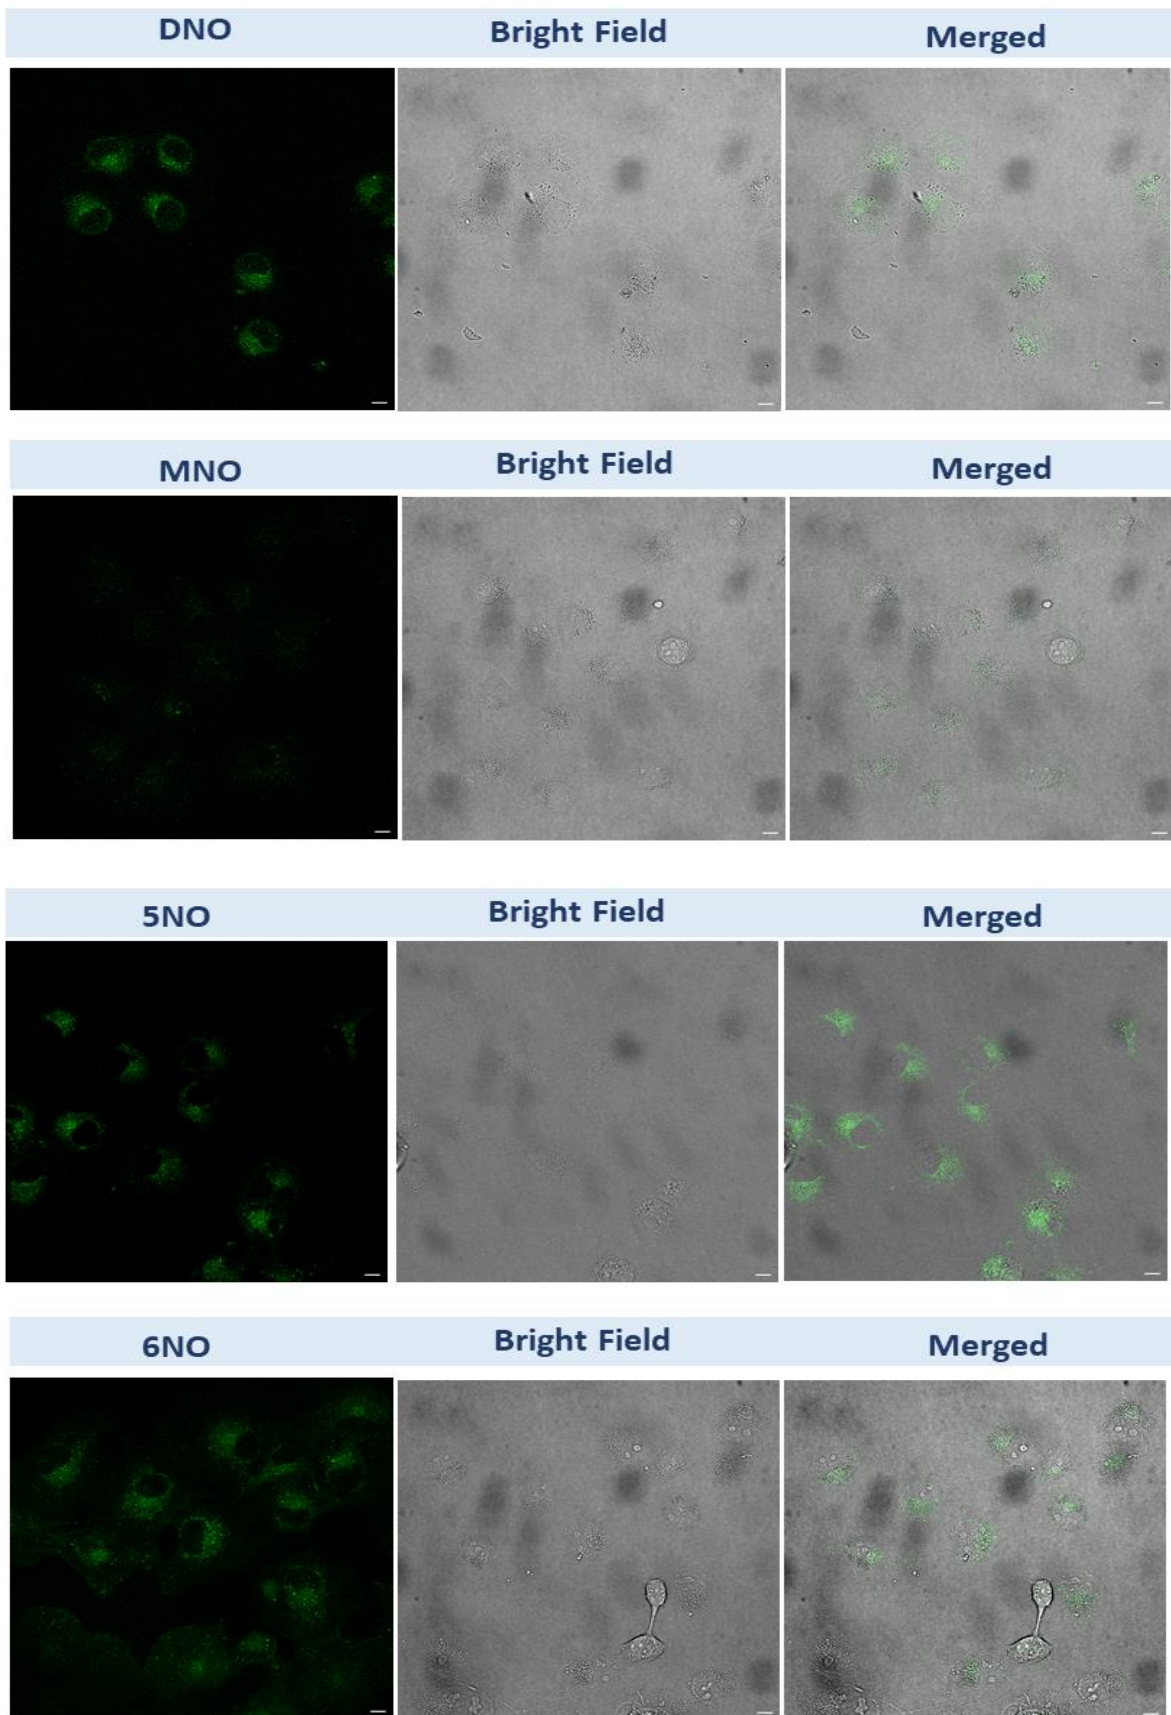

**Figure S10:** MTT Assay for TNO and TNC. The compounds are good for cellular imaging studies with over 80% cell viability at all concentrations. The imaging is performed at 1  $\mu\text{M}$ ,

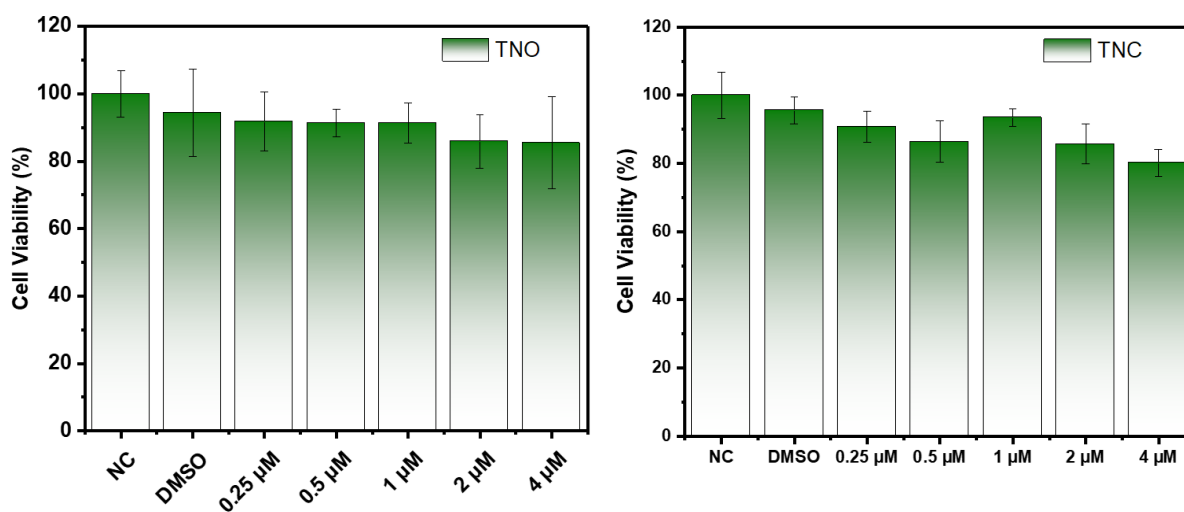

**Table S6:** Molar absorption coefficient ( $\epsilon$ ) of all compounds in different solvents

| Solvent          | DNO        | 5NO        | 6NO        | MNO        | TNO        |
|------------------|------------|------------|------------|------------|------------|
|                  | $\epsilon$ | $\epsilon$ | $\epsilon$ | $\epsilon$ | $\epsilon$ |
| Dioxane          | 19.7       | 6.9        | 10.1       | 5.6        | 9.7        |
| THF              | 19.8       | 6.8        | 10.5       | 7.1        | 9.9        |
| EtOH             | 17.1       | 5.9        | 7.4        | 4.5        | 9.8        |
| MeOH             | 16.4       | 5.7        | 8.2        | 5.0        | 10.0       |
| ACN              | 19.2       | 6.2        | 10.5       | 6.3        | 9.9        |
| DMF              | 18.9       | 5.7        | 10.2       | 5.9        | 9.5        |
| DMSO             | 18.3       | 5.2        | 7.9        | 5.4        | 9.0        |
| H <sub>2</sub> O | 13.2       | 4.2        | 5.8        | 4.1        | 6.6        |

$\epsilon$  ( $\text{M}^{-1} \text{cm}^{-1}$ )  $\times 10^3$

## S11. Characterisation data

### (E)-4-(4-(dimethylamino)styryl)pyridine 1-oxide (DNO)

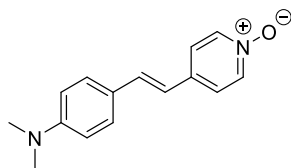

**<sup>1</sup>H NMR** (500 MHz, DMSO-d<sub>6</sub>): δ 8.11 (d, *J* = 6.5 Hz, 2H), 7.51 (d, *J* = 7 Hz, 2H), 7.44 (d, *J* = 8.5 Hz, 2H), 7.27 (d, *J* = 16.5 Hz, 1H), 6.94 (d, *J* = 16.5 Hz, 1H), 6.72 (d, *J* = 8.5 Hz, 2H), 2.95 (s, 6H). **<sup>13</sup>C NMR** (126 MHz; DMSO-d<sub>6</sub>) δ 150.92, 138.96, 135.64, 132.56, 128.57, 124.50, 123.09, 119.92, 112.58, 40.58. **HRMS** (ESI) *m/z* calcd for C<sub>15</sub>H<sub>17</sub>N<sub>2</sub>O<sup>+</sup> [M + H]<sup>+</sup> 241.1335, found 241.1320.

### (E)-4-(4-(pyrrolidin-1-yl)styryl)pyridine 1-oxide (5NO)

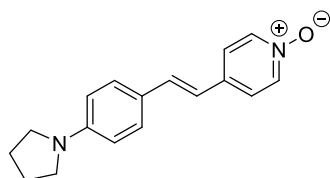

**<sup>1</sup>H NMR** (500 MHz, DMSO-d<sub>6</sub>): δ 8.10 (d, *J* = 7 Hz, 2H), 7.5 (d, *J* = 7 Hz, 2H), 7.43 (d, *J* = 8.5 Hz, 2H), 7.26 (d, *J* = 16.5 Hz, 1H), 6.91 (d, *J* = 16.5 Hz, 1H), 6.55 (d, *J* = 8.5 Hz, 2H), 3.26 (t, *J* = 6 Hz, 4H), 1.95 (t, *J* = 6.5 Hz, 4H). **<sup>13</sup>C NMR** (126 MHz; DMSO-d<sub>6</sub>) δ 148.31, 138.94, 135.82, 132.87, 128.76, 123.76, 122.98, 119.24, 112.22, 47.71, 25.43. **HRMS** (ESI) *m/z* calcd for C<sub>17</sub>H<sub>19</sub>N<sub>2</sub>O<sup>+</sup> [M + H]<sup>+</sup> 267.1492, found 267.1477.

### (E)-4-(4-(piperidin-1-yl)styryl)pyridine 1-oxide (6NO)

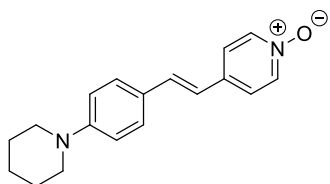

**<sup>1</sup>H NMR** (500 MHz, CDCl<sub>3</sub>): δ 8.00 (d, *J* = 6.5 Hz, 2H), 7.27 (d, *J* = 9 Hz, 2H), 7.15 (d, *J* = 6.5 Hz, 2H), 6.95 (d, *J* = 16 Hz, 1H), 6.78 (d, *J* = 8.5 Hz, 2H), 6.63 (d, *J* = 16.5 Hz, 1H), 3.13 (t, *J* = 5 Hz, 4H), 1.60-1.49 (m, 7H). **<sup>13</sup>C NMR** (126 MHz; CDCl<sub>3</sub>) δ 151.14, 137.90, 135.75, 131.88, 127.17, 124.78, 121.34, 118.93, 114.40, 48.45, 24.50, 23.26. **HRMS** (ESI) *m/z* calcd for C<sub>18</sub>H<sub>21</sub>N<sub>2</sub>O<sup>+</sup> [M + H]<sup>+</sup> 281.1648, found 281.1634.

**(E)-4-(4-morpholinostyryl)pyridine 1-oxide (MNO)**

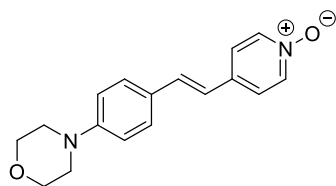

**<sup>1</sup>H NMR** (500 MHz, CDCl<sub>3</sub>): δ 8.12 (d, J= 7 Hz, 2H), 7.43 (d, J= 8.5 Hz, 2H), 7.31 (d, J= 7 Hz, 2H), 7.09 (d, J= 16 Hz, 1H), 6.90 (d, J= 8.5 Hz, 2H), 6.81 (d, J= 16 Hz, 1H), 3.87 (t, J= 4.5 Hz, 4H), 3.23 (t, J= 5 Hz, 4H) **<sup>13</sup>C NMR** (126 MHz; CDCl<sub>3</sub>) δ 151.57, 139.03, 136.47, 132.61, 128.20, 127.17, 122.53, 120.83, 115.15, 66.72, 48.45 **HRMS** (ESI) m/z calcd for C<sub>17</sub>H<sub>19</sub>N<sub>2</sub>O<sub>2</sub><sup>+</sup> [M + H]<sup>+</sup> 283.1441, found 283.1427.

**(E)-4-(4-(diphenylamino)styryl)pyridine 1-oxide (TNO)**

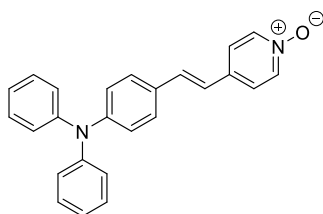

**<sup>1</sup>H NMR** (500 MHz, CDCl<sub>3</sub>): δ 8.39 (d, J= 6 Hz, 2H), 7.24 (d, J= 8.5 Hz, 2H), 7.17-7.07 (m, 7H), 6.98 (d, J= 8 Hz, 4H), 6.93-6.90 (m, 4H), 6.72 (d, J= 16.5 Hz, 1H). **<sup>13</sup>C NMR** (126 MHz; CDCl<sub>3</sub>) δ 148.97, 147.35, 146.16, 143.89, 131.60, 128.69, 128.33, 126.91, 123.80, 122.77, 122.42, 121.71, 119.56 **HRMS** (ESI) m/z calcd for C<sub>25</sub>H<sub>21</sub>N<sub>2</sub>O<sup>+</sup> [M + H]<sup>+</sup> 365.1648, found 365.1635.



### (E)-4-(4-(dimethylamino)styryl)pyridine 1-oxide (DNO)

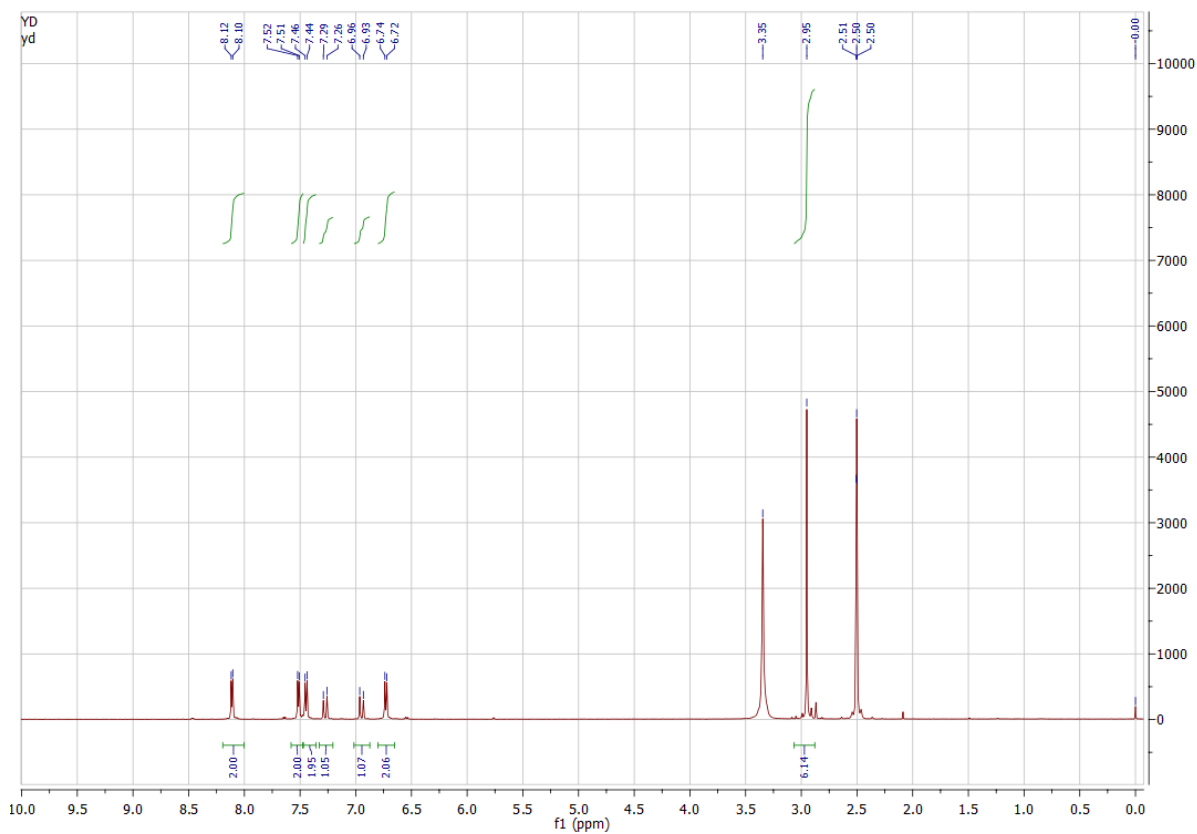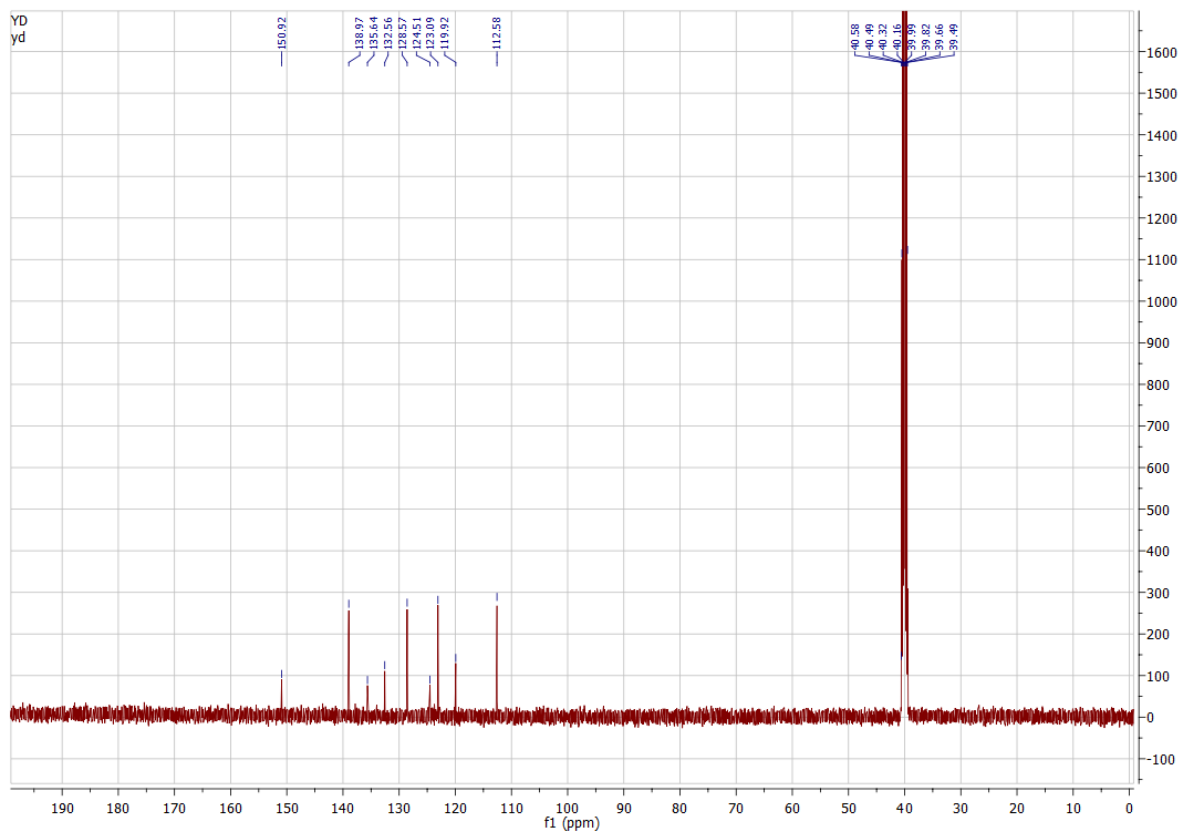

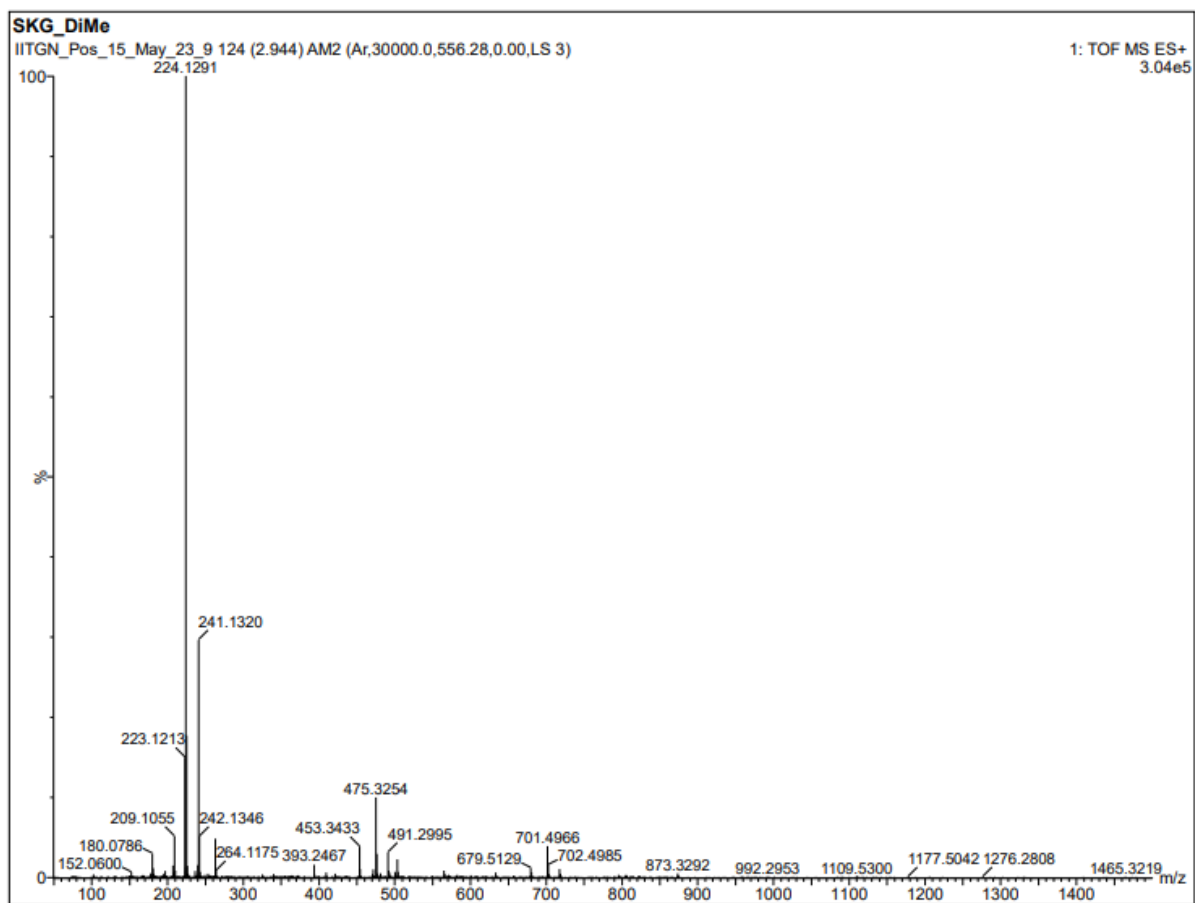

**(E)-4-(4-(pyrrolidin-1-yl)styryl)pyridine 1-oxide (5NO)**

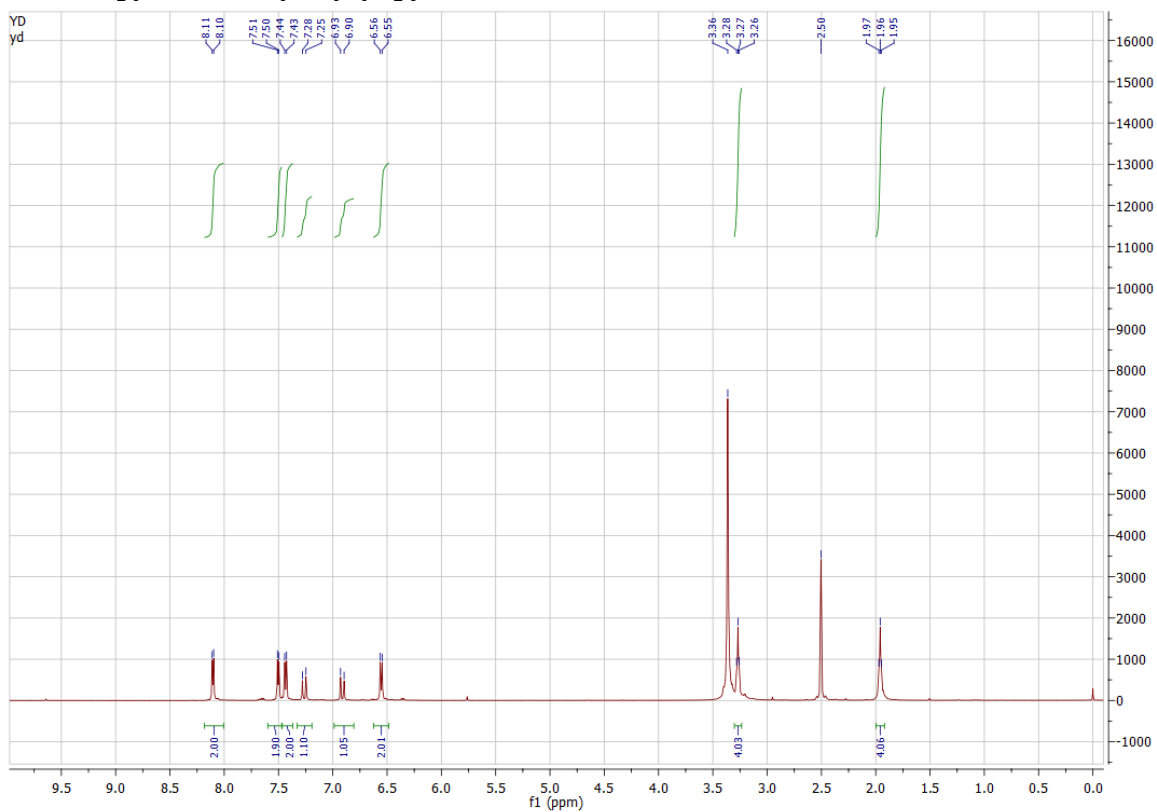

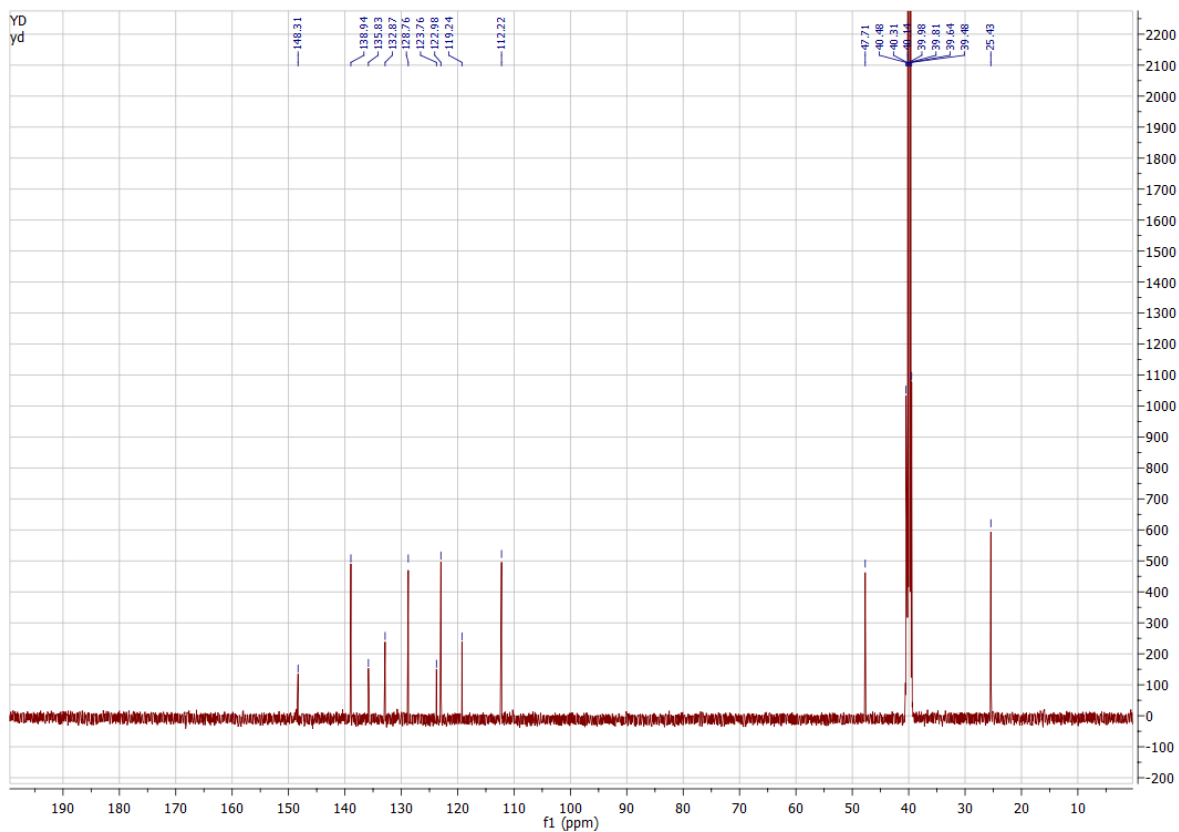

IITGN\_Pos\_15\_May\_23\_12 289 (6.821) AM2 (Ar,30000.0,556.28,0.00,LS 3)

1: TOF MS ES+  
1.69e5

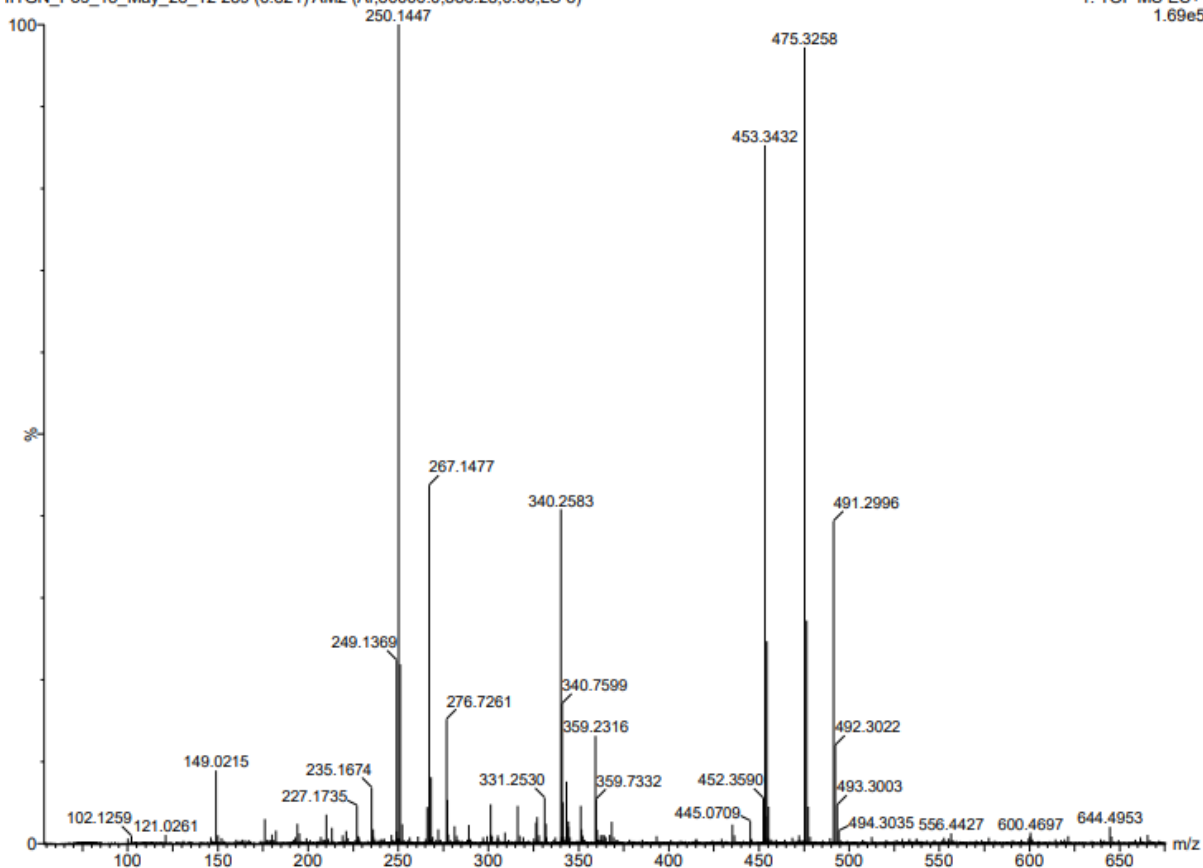

**(E)-4-(4-(piperidin-1-yl)styryl)pyridine 1-oxide (6NO)**

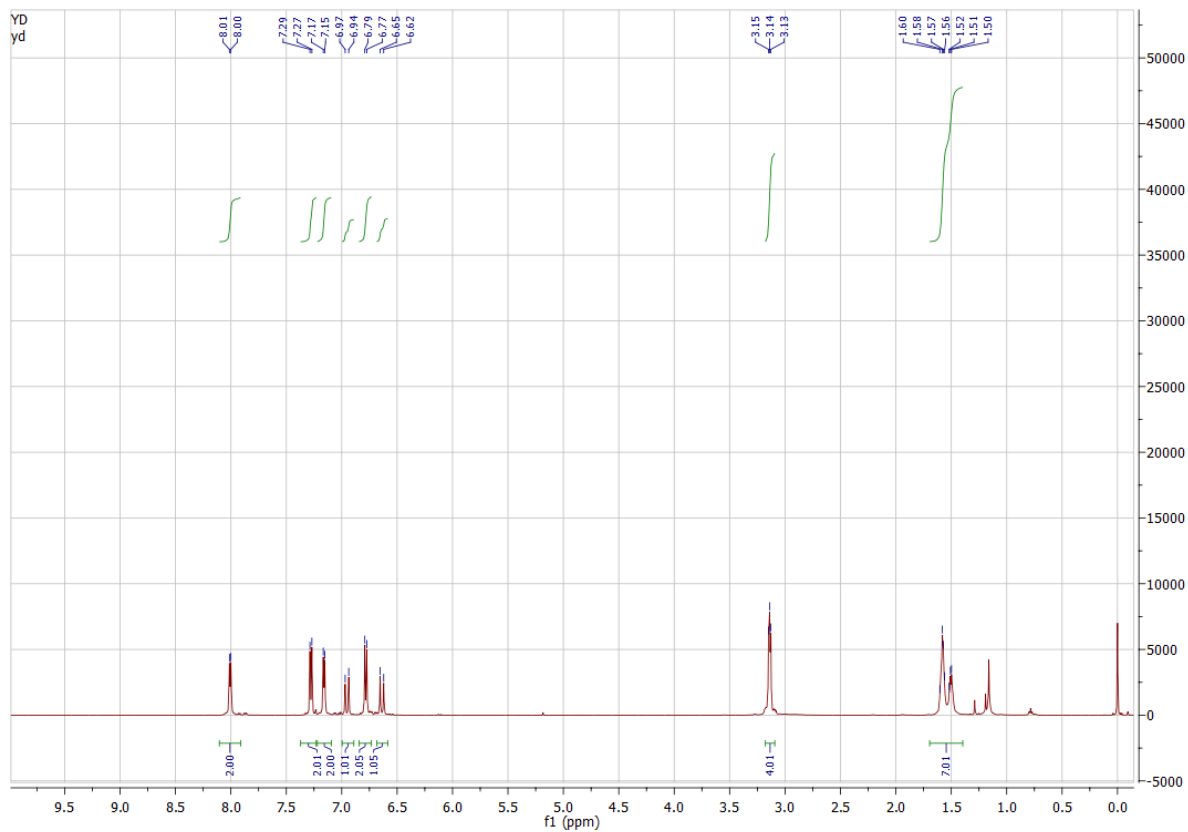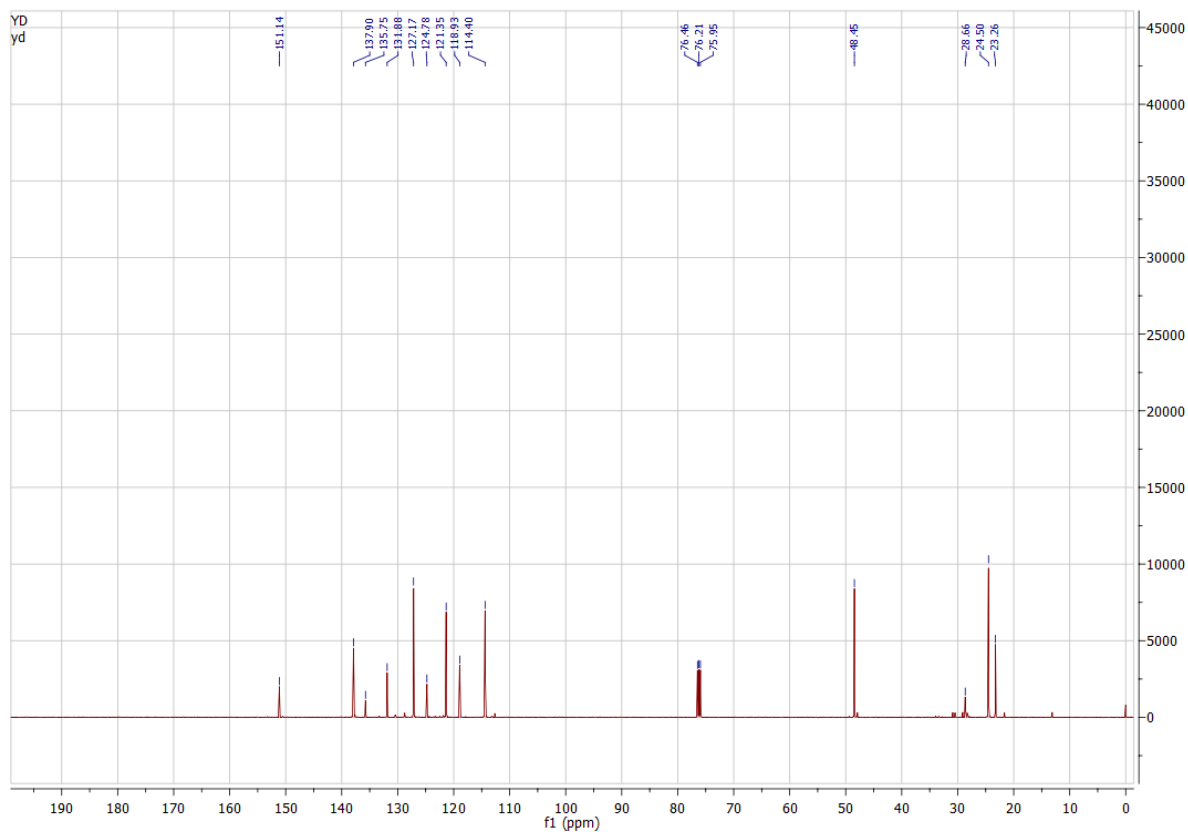

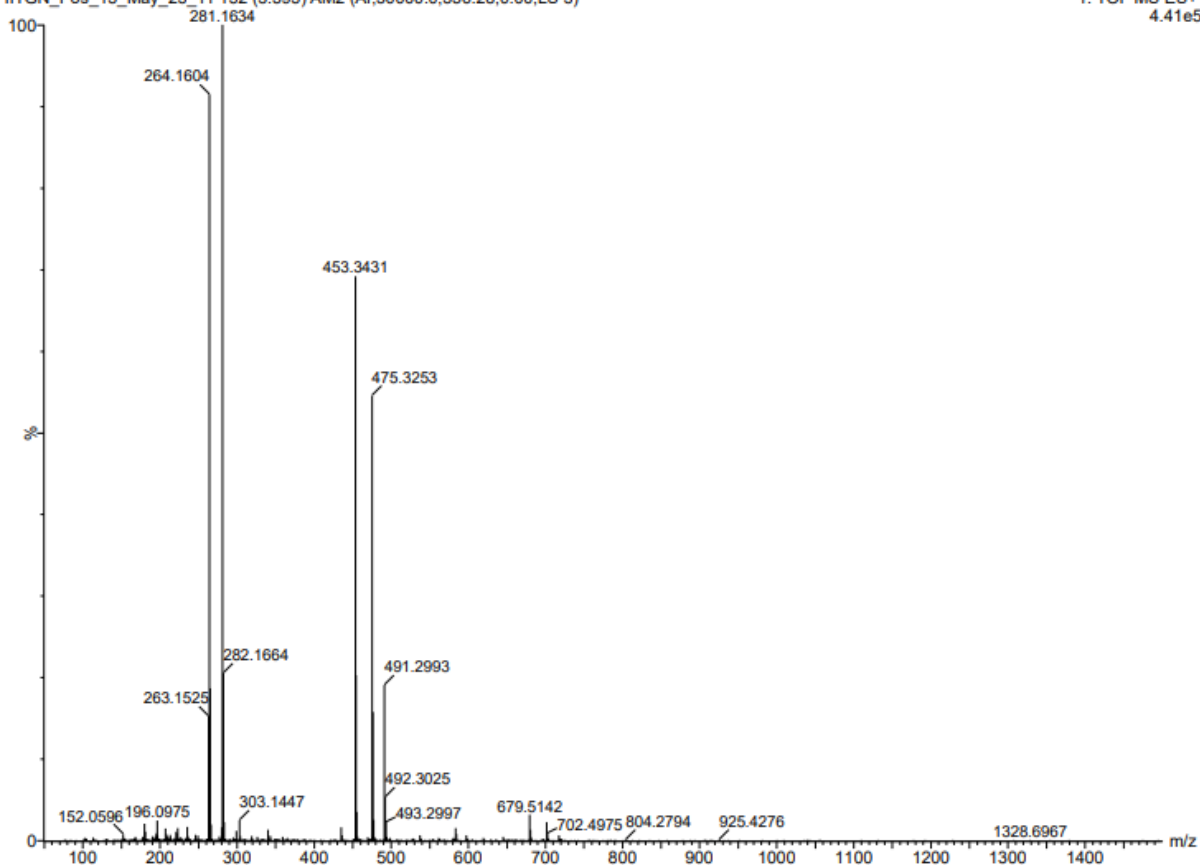

**(E)-4-(4-morpholinostyryl)pyridine 1-oxide (MNO)**

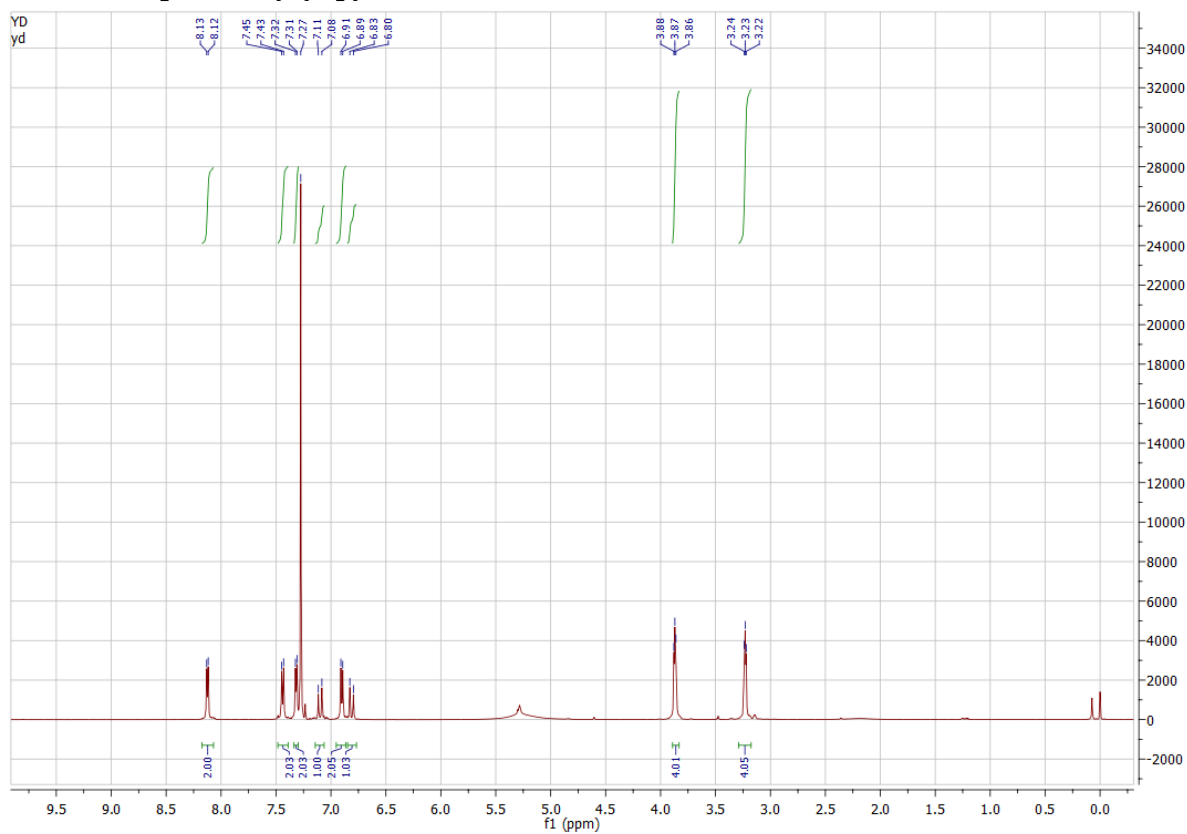

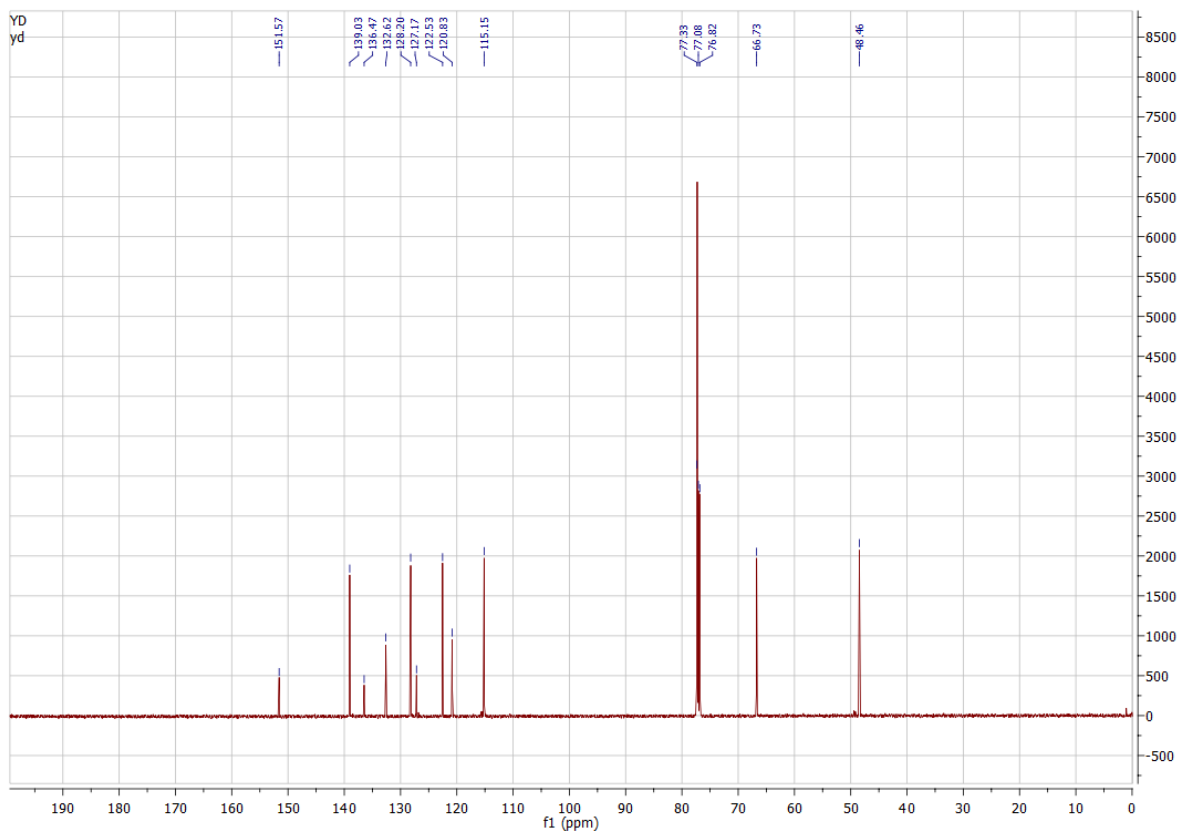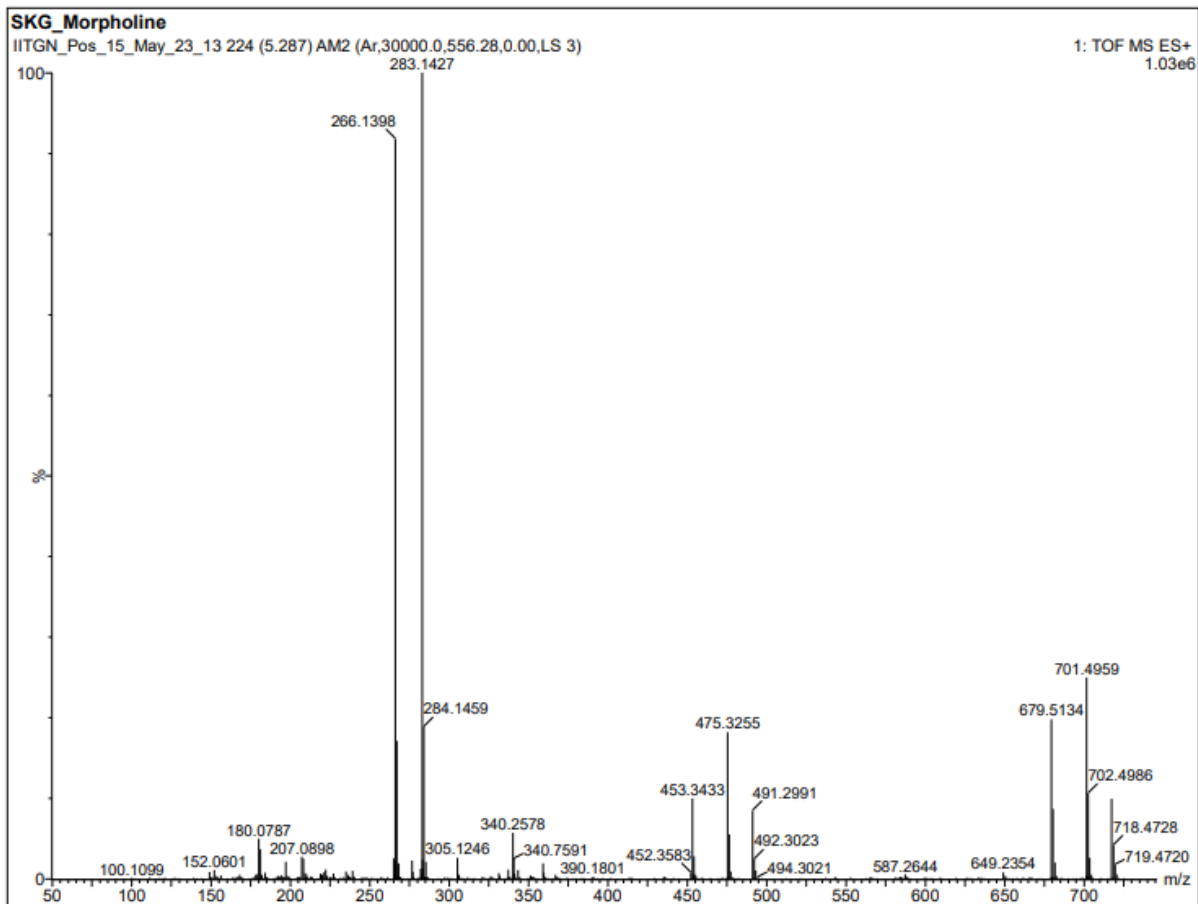

**(E)-4-(4-(diphenylamino)styryl)pyridine 1-oxide (TNO)**

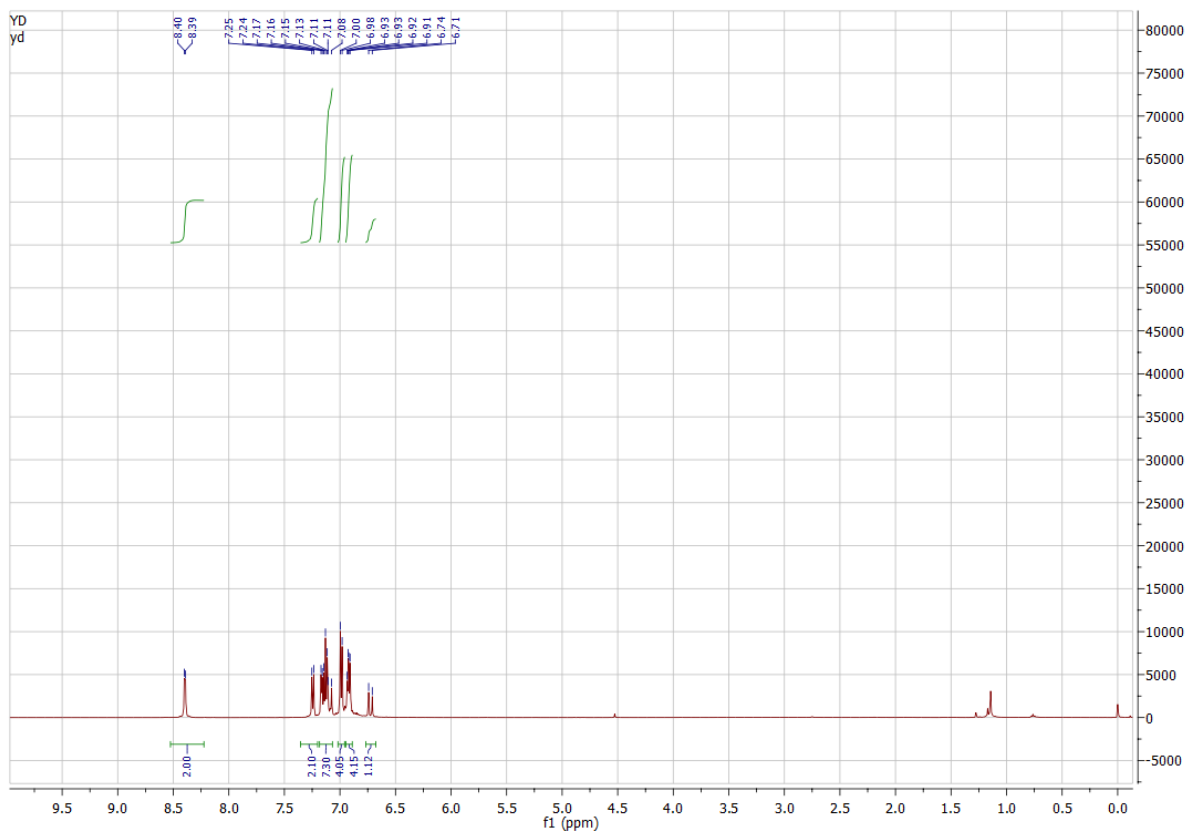

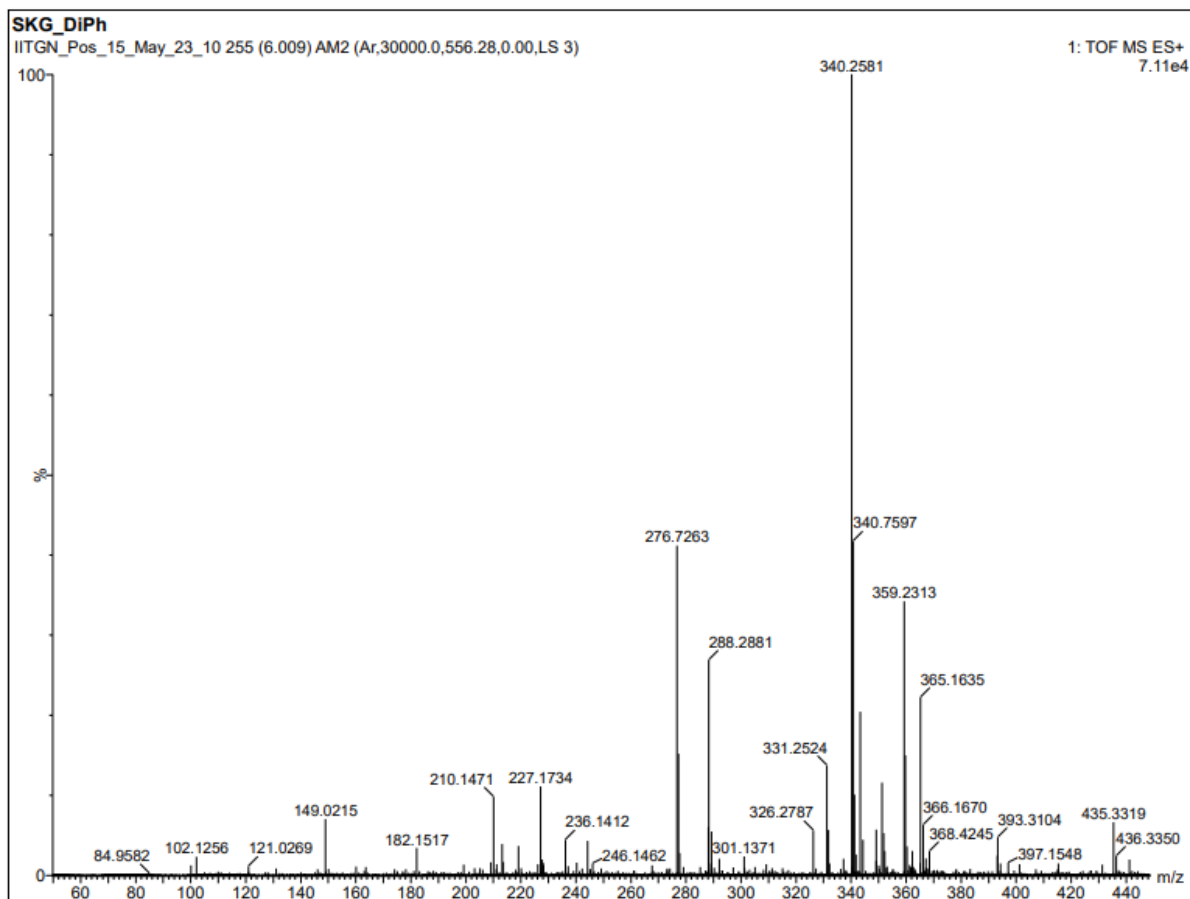

## References

1. Tydlitát, J., Achelle, S., Rodríguez-López, J., Pytela, O., Mikýsek, T., Cabon, N., ... & Bureš, F. *Dyes and Pigments*, 2017, **146**, 467-478.
2. Kumari, B., Singh, A., Jana, P., Radhakrishna, M., & Kanvah, S. *New Journal of Chemistry*, 2019, **43(29)**, 11701-11709.
